# Supplementary material for: Solid and liquid charge-transfer complex formation between 1-methylnaphthalene and 1-alkyl-cyanopyridinium bis{(trifluoromethyl)sulfonyl}imide ionic liquids
Source: Royal Society of Chemistry journal article supplement (doi:10.1039/b921160h), 2010-01-01
Supplement: b921160h.pdf [file b921160h.pdf]

## Solid and liquid charge-transfer complex formation between 1-methylnaphthalene and 1-alkyl-cyanopyridinium bis{(trifluoromethyl)sulfonyl}imide ionic liquids

Christopher Hardacre,<sup>a</sup> John D. Holbrey,<sup>a</sup> Claire L. Mullan,<sup>a</sup> Mark Nieuwenhuyzen,<sup>a</sup>  
Tristan G. A. Youngs,<sup>a</sup> Daniel T. Bowron,<sup>b</sup> Simon J. Teat<sup>c</sup>

<sup>a</sup>*School of Chemistry and Chemical Engineering/School of Mathematics and Physics, The  
QUILL Centre, Queen's University Belfast, Belfast BT9 5AG, UK*

<sup>b</sup>*Rutherford Appleton Laboratory, Chilton, Didcot, Oxon, OX11 0QX, UK*

<sup>c</sup>*Advanced Light Source, Lawrence Berkeley National Lab, 1 Cyclotron Rd, Berkeley,  
CA94720, USA*

Tel. No. +44 28 9097 4592, Fax. No. +44 28 9097 4687  
e-mail: c.hardacre@qub.ac.uk

### Electronic Supplementary Information

**Table S1.** Intramolecular distance constraints used to define the basic structure of the 1-methyl-4-cyanopyridinium cation.

**Table S2.** Intramolecular distance constraints used to define the basic structure of the bis{(trifluoromethyl)sulfonyl}imide anion.

**Table S3.** Intramolecular distance constraints used to define the basic structure of the 1-methylnaphthalene molecule.

**Figure S1** Local structure around a central cation in the crystal structures of the 1:1 complex of 1-methyl-4-cyanopyridinium bis{(trifluoromethyl)sulfonyl}imide (*top*) and 1-ethyl-4-cyanopyridinium bis{(trifluoromethyl)sulfonyl}imide (*middle*) with 1-methylnaphthalene, and pure 1-ethyl-4-cyanopyridinium bis{(trifluoromethyl)sulfonyl}imide with disordered anion (*bottom*). All contacts shown are less than the sum of the van der Waals radii except those connecting cations in the 1-ethyl-4-cyanopyridinium bis{(trifluoromethyl)sulfonyl}imide/1-methylnaphthalene structure which are less than the sum of the van der Waals radii plus 0.3 Å.

**Figure S2** Distributions of CF<sub>3</sub>...CF<sub>3</sub> distances from EPSR analysis of the pure ionic liquid (black line) and the 1:1 complex with 1-methylnaphthalene (red line), and simulated data for the 1:1 complex (red dashed line).

**Figure S3** Cumulative probabilities of aromatic-aromatic plane-plane angles for the tiny pre-shoulder (red,  $0 < r < 4.7 \text{ \AA}$ ) in the MD aromatic-aromatic RDF, the bulk of the main peak (green,  $4.7 < r < 7.1 \text{ \AA}$ ) and another apparent shoulder (blue,  $7.1 < r < 9.8 \text{ \AA}$ ).

**Table S1.** Intramolecular distance constraints used to define the basic structure of the 1-methyl-4-cyanopyridinium cation.

| $d / \text{Å}$     | N(R) <sub>1</sub> | C(R) <sub>2</sub> | C(R) <sub>3</sub> | C(R) <sub>4</sub> | C(R) <sub>5</sub> | C(R) <sub>6</sub> | C(N) <sub>7</sub> | N(N) <sub>8</sub> | C(M) <sub>9</sub> | H(R) <sub>10</sub> | H(R) <sub>11</sub> | H(R) <sub>12</sub> | H(R) <sub>13</sub> | H(M) <sub>14</sub> | H(M) <sub>15</sub> | H(M) <sub>16</sub> |
|--------------------|-------------------|-------------------|-------------------|-------------------|-------------------|-------------------|-------------------|-------------------|-------------------|--------------------|--------------------|--------------------|--------------------|--------------------|--------------------|--------------------|
| N(R) <sub>1</sub>  | 1.37              | 2.40              | 2.78              | 2.40              | 1.37              | 4.22              | 5.37              | 1.46              | 2.14              | 3.38               | 3.38               | 2.13               | 2.14               | 2.12               | 2.12               | 2.12               |
| C(R) <sub>2</sub>  | 1.40              | 2.41              | 2.77              | 2.37              | 2.37              | 3.73              | 4.84              | 2.46              | 1.08              | 2.15               | 3.86               | 3.36               | 2.57               | 3.18               | 3.18               | 3.18               |
| C(R) <sub>3</sub>  | 1.40              | 2.41              | 2.77              | 2.46              | 2.46              | 3.51              | 3.75              | 2.14              | 1.08              | 3.40               | 3.40               | 3.86               | 3.97               | 4.38               | 4.38               | 4.38               |
| C(R) <sub>4</sub>  | 1.40              | 2.41              | 2.77              | 2.46              | 2.46              | 3.51              | 3.75              | 2.14              | 1.08              | 3.40               | 3.40               | 3.86               | 3.97               | 4.38               | 4.38               | 4.38               |
| C(R) <sub>5</sub>  | 1.40              | 2.41              | 2.77              | 2.46              | 2.46              | 3.51              | 3.75              | 2.14              | 1.08              | 3.40               | 3.40               | 3.86               | 3.97               | 4.38               | 4.38               | 4.38               |
| C(R) <sub>6</sub>  | 1.40              | 2.41              | 2.77              | 2.46              | 2.46              | 3.51              | 3.75              | 2.14              | 1.08              | 3.40               | 3.40               | 3.86               | 3.97               | 4.38               | 4.38               | 4.38               |
| C(N) <sub>7</sub>  | 1.40              | 2.41              | 2.77              | 2.46              | 2.46              | 3.51              | 3.75              | 2.14              | 1.08              | 3.40               | 3.40               | 3.86               | 3.97               | 4.38               | 4.38               | 4.38               |
| N(N) <sub>8</sub>  | 1.40              | 2.41              | 2.77              | 2.46              | 2.46              | 3.51              | 3.75              | 2.14              | 1.08              | 3.40               | 3.40               | 3.86               | 3.97               | 4.38               | 4.38               | 4.38               |
| C(M) <sub>9</sub>  | 1.40              | 2.41              | 2.77              | 2.46              | 2.46              | 3.51              | 3.75              | 2.14              | 1.08              | 3.40               | 3.40               | 3.86               | 3.97               | 4.38               | 4.38               | 4.38               |
| H(R) <sub>10</sub> | 1.40              | 2.41              | 2.77              | 2.46              | 2.46              | 3.51              | 3.75              | 2.14              | 1.08              | 3.40               | 3.40               | 3.86               | 3.97               | 4.38               | 4.38               | 4.38               |
| H(R) <sub>11</sub> | 1.40              | 2.41              | 2.77              | 2.46              | 2.46              | 3.51              | 3.75              | 2.14              | 1.08              | 3.40               | 3.40               | 3.86               | 3.97               | 4.38               | 4.38               | 4.38               |
| H(R) <sub>12</sub> | 1.40              | 2.41              | 2.77              | 2.46              | 2.46              | 3.51              | 3.75              | 2.14              | 1.08              | 3.40               | 3.40               | 3.86               | 3.97               | 4.38               | 4.38               | 4.38               |
| H(R) <sub>13</sub> | 1.40              | 2.41              | 2.77              | 2.46              | 2.46              | 3.51              | 3.75              | 2.14              | 1.08              | 3.40               | 3.40               | 3.86               | 3.97               | 4.38               | 4.38               | 4.38               |
| H(M) <sub>14</sub> | 1.40              | 2.41              | 2.77              | 2.46              | 2.46              | 3.51              | 3.75              | 2.14              | 1.08              | 3.40               | 3.40               | 3.86               | 3.97               | 4.38               | 4.38               | 4.38               |
| H(M) <sub>15</sub> | 1.40              | 2.41              | 2.77              | 2.46              | 2.46              | 3.51              | 3.75              | 2.14              | 1.08              | 3.40               | 3.40               | 3.86               | 3.97               | 4.38               | 4.38               | 4.38               |
| H(M) <sub>16</sub> | 1.40              | 2.41              | 2.77              | 2.46              | 2.46              | 3.51              | 3.75              | 2.14              | 1.08              | 3.40               | 3.40               | 3.86               | 3.97               | 4.38               | 4.38               | 4.38               |





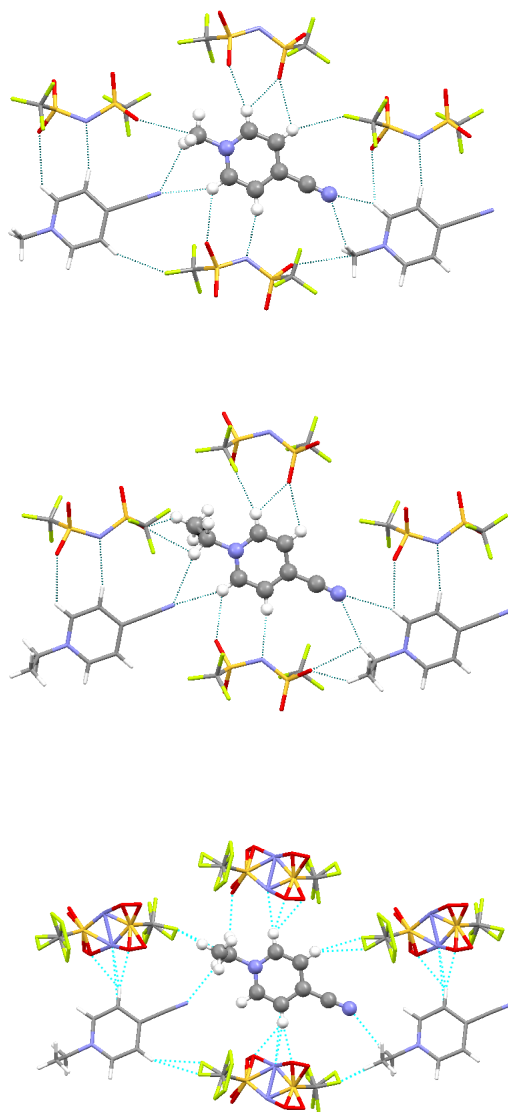

**Figure S1** Local structure around a central cation in the crystal structures of the 1:1 complex of 1-methyl-4-cyanopyridinium bis{(trifluoromethyl)sulfonyl}imide (*top*) and 1-ethyl-4-cyanopyridinium bis{(trifluoromethyl)sulfonyl}imide (*middle*) with 1-methylnaphthalene, and pure 1-ethyl-4-cyanopyridinium bis{(trifluoromethyl)sulfonyl}imide with disordered anion (*bottom*). All contacts shown are less than the sum of the van der Waals radii except those connecting cations in the 1-ethyl-4-cyanopyridinium bis{(trifluoromethyl)sulfonyl}imide/1-methylnaphthalene structure which are less than the sum of the van der Waals radii plus 0.3 Å.

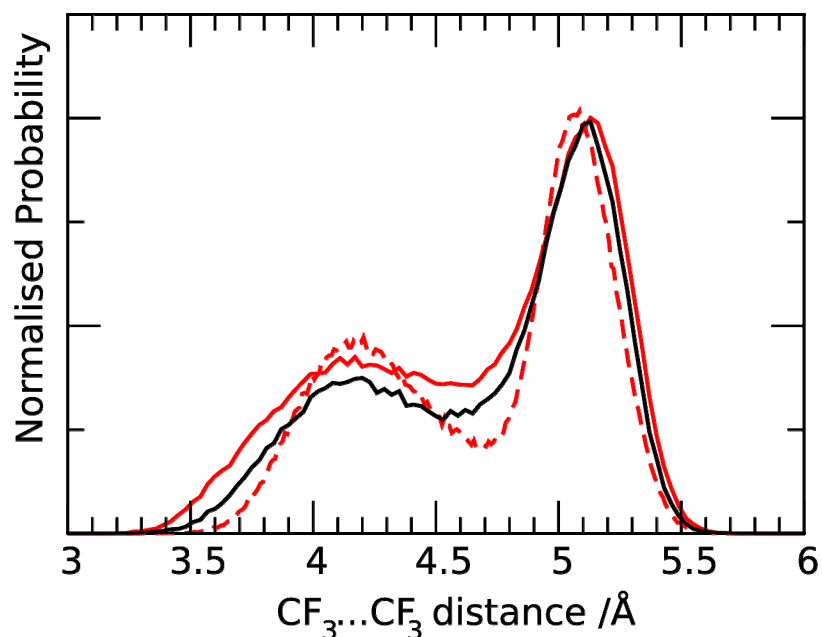

**Figure S2** Distributions of  $\text{CF}_3\cdots\text{CF}_3$  distances from EPSR analysis of the pure ionic liquid (black line) and the 1:1 complex with 1-methylnaphthalene (red line), and simulated data for the 1:1 complex (red dashed line).

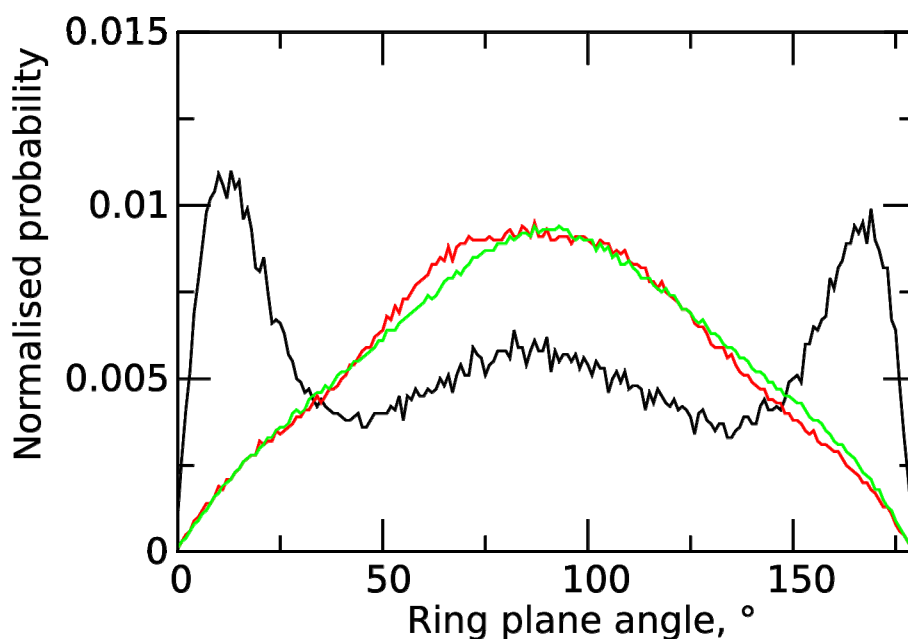

**Figure S3** Cumulative probabilities of aromatic-aromatic plane-plane angles for the tiny pre-shoulder (red,  $0 < r < 4.7 \text{ \AA}$ ) in the MD aromatic-aromatic RDF, the bulk of the main peak (green,  $4.7 < r < 7.1 \text{ \AA}$ ) and another apparent shoulder (blue,  $7.1 < r < 9.8 \text{ \AA}$ ).
